# Supplementary material
Source: MDPI journal article supplement (https://www.mdpi.com/2673-5601/3/3/18)
Supplement: s1 [file s1]

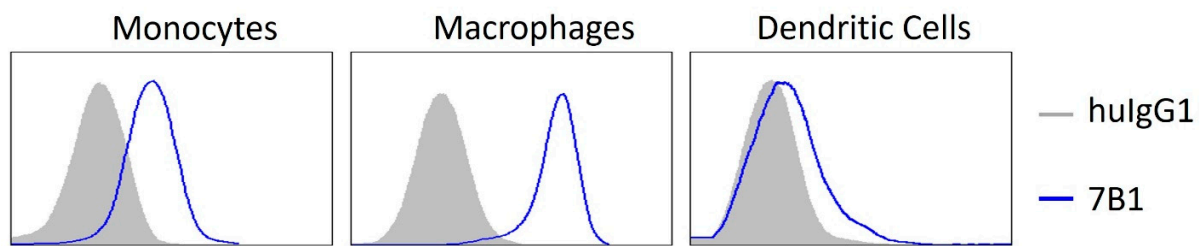

**Supplementary Figure S1.** Binding of 7B1 to primary immune cells. Human donor monocytes, macrophages, or dendritic cells (DC) were incubated with 33 nM 7B1 or hulgG1 isotype control, followed by detection with a PE labeled Fc-specific secondary.

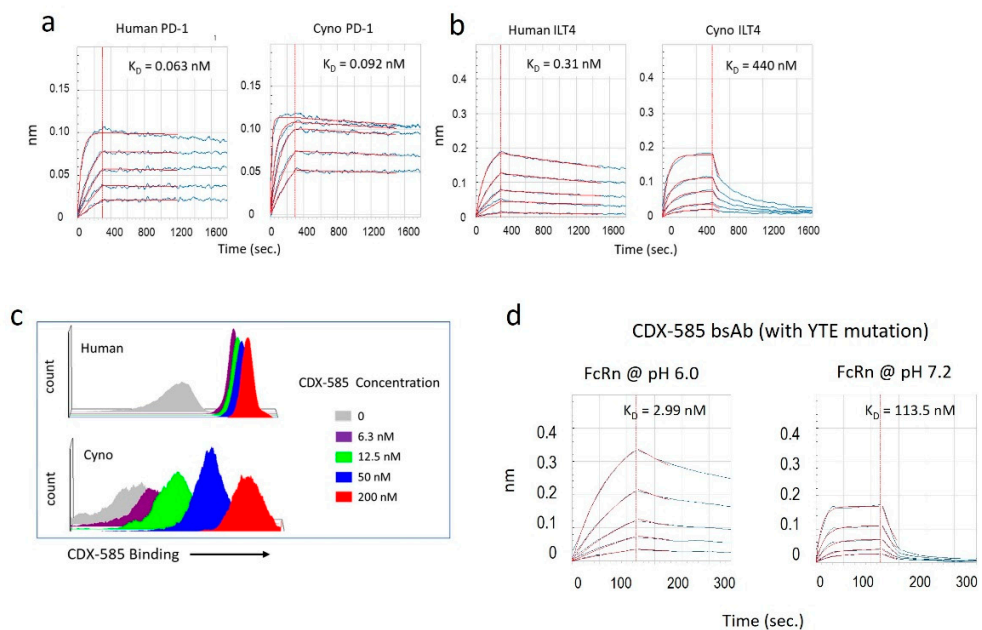

**Supplementary Figure S2.** Binding affinity of CDX-585 to human and cynomolgus PD-1 and ILT4. **(a)** Sensorgrams of bio-layer interferometry analysis using anti-human IgG-Fc sensors to capture CDX-585 followed by human or cynomolgus monomeric soluble PD-1. **(b)** Sensorgrams of bio-layer interferometry analysis using anti-human IgG-Fc sensors to capture CDX-585 followed by human or cynomolgus soluble ILT4. **(c)** Peripheral blood mononuclear cells (PBMC) from human or cynomolgus sources were incubated for 20 minutes at room temperature with biotin-labeled CDX-585 and detected with a streptavidin-PE probe. **(d)** Sensorgrams of bio-layer interferometry analysis determining CDX-585 binding to neonatal Fc receptor (FcRn) at pH 6.0 and pH 7.2.
